# Supplementary material for: A novel study on curcumin metal complexes: solubility improvement, bioactivity, and trial burn wound treatment in rats
Source: Royal Society of Chemistry journal article supplement (doi:10.1039/d0nj01159b), 2020-01-01
Supplement: d0nj01159b1.pdf [file d0nj01159b1.pdf]

SUPPLEMENTARY

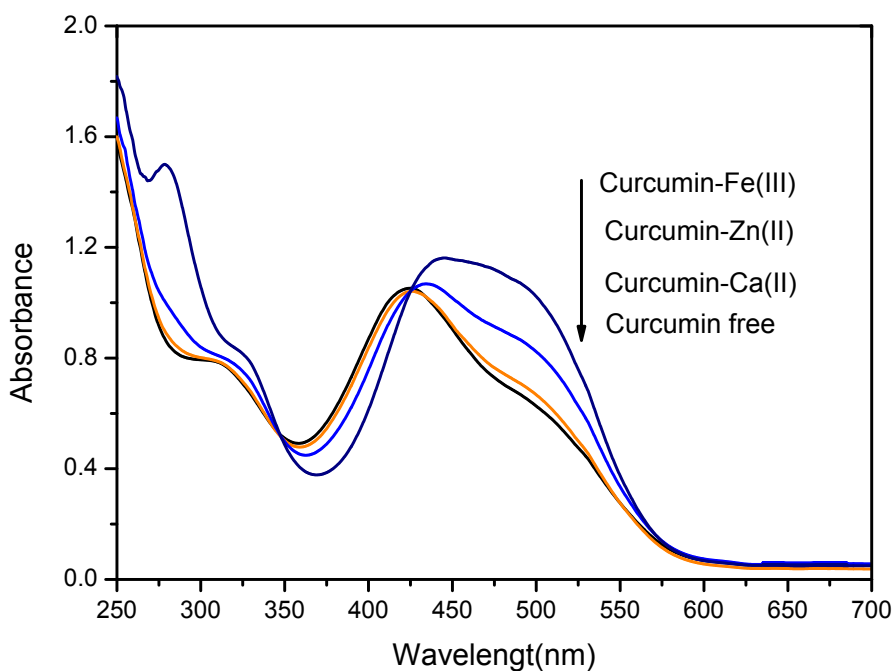

Fig s1. UV-Vis spectra of the free ligand and the complexes in aqueous solutions obtained after syntheses

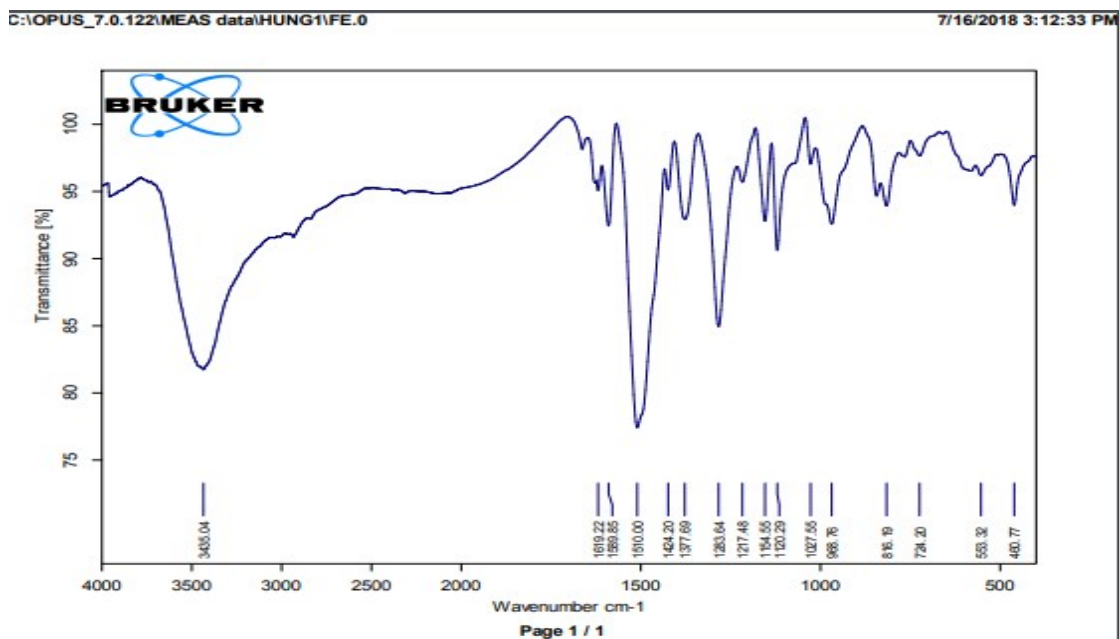

Fig S2. IR spectra of curcumin-Fe(III) (a), curcumin-Zn(II) (b), and curcumin-Ca (II) complex (c)

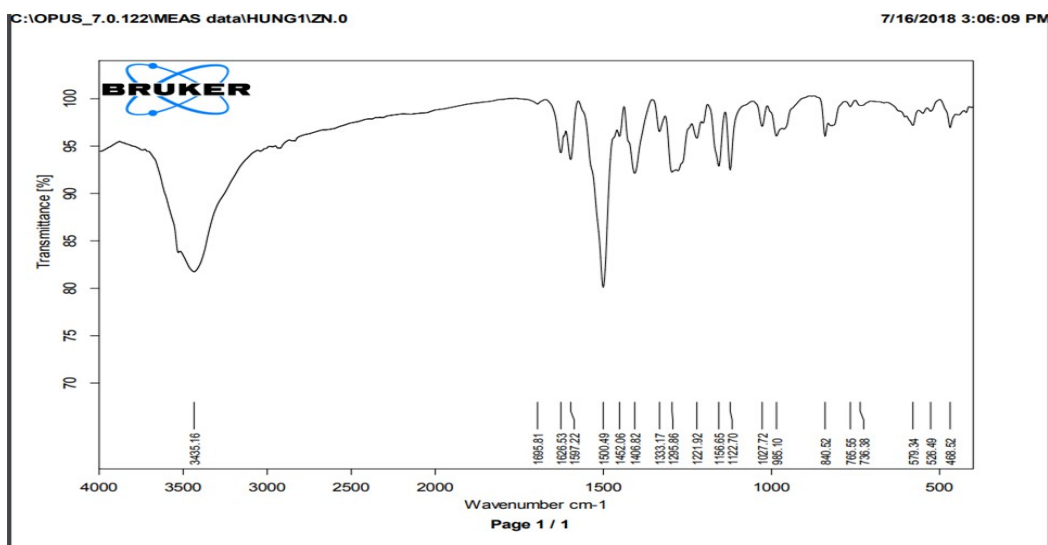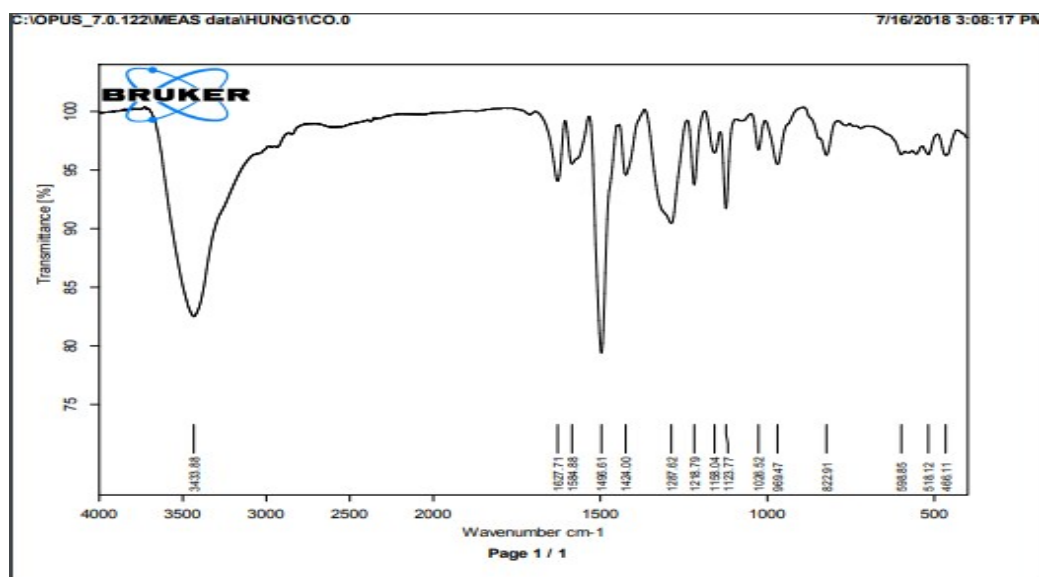

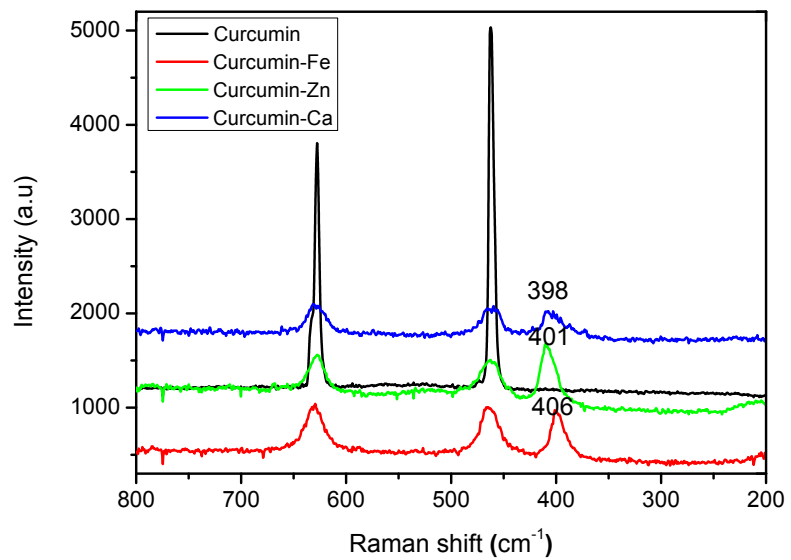

Fig s3. Raman spectra of curcumin and its complexes

Fig S4a. Some of mice in the treatment

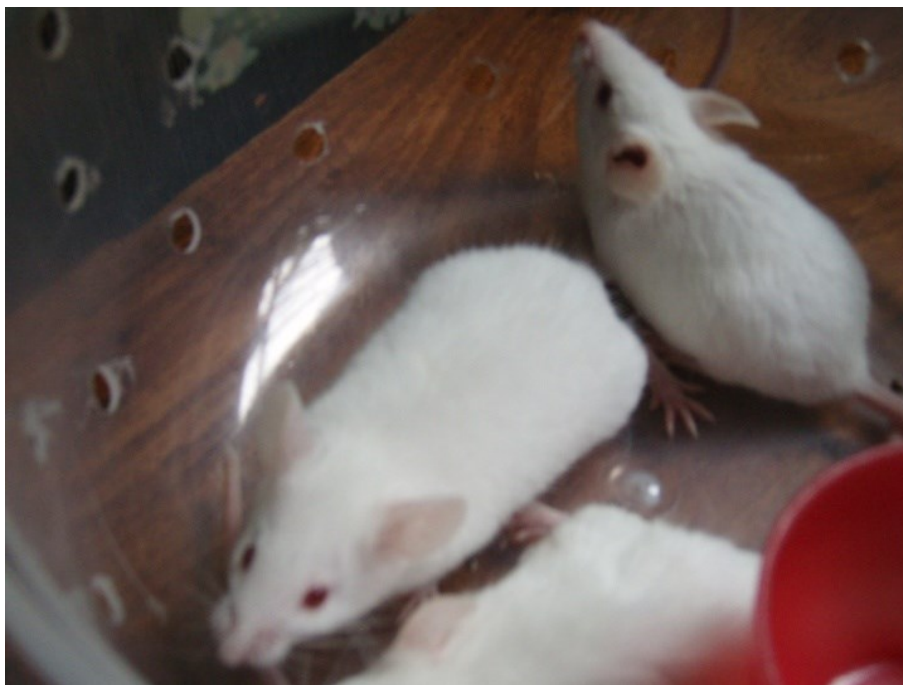

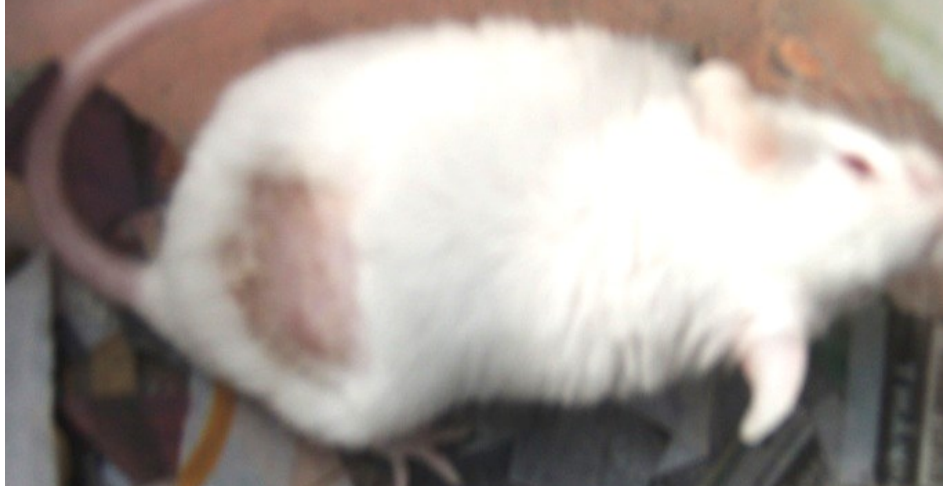

**Fig S4b.** The burn on the back of rat

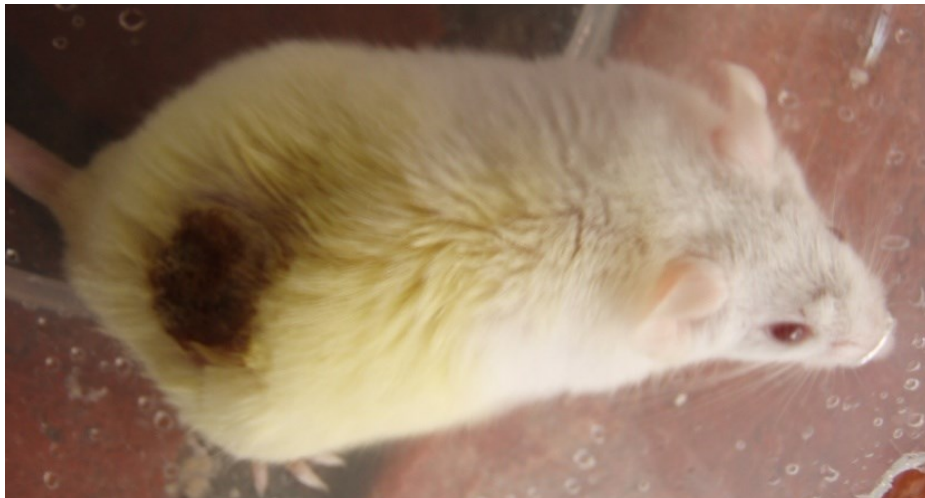

**Fig S4c.** The burn after 3 day was treated by curcumin

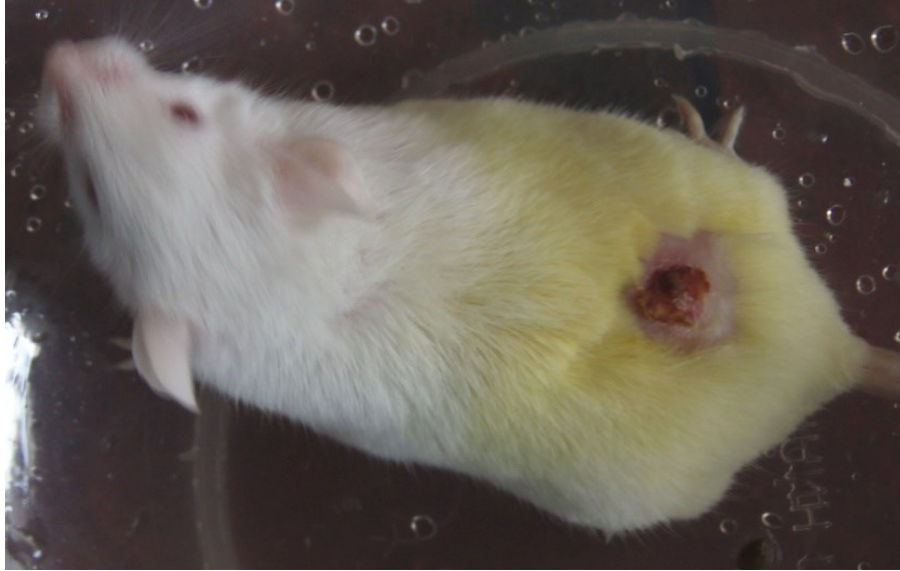

**Fig S4d.** The burn after 6 day was treated by curcumin

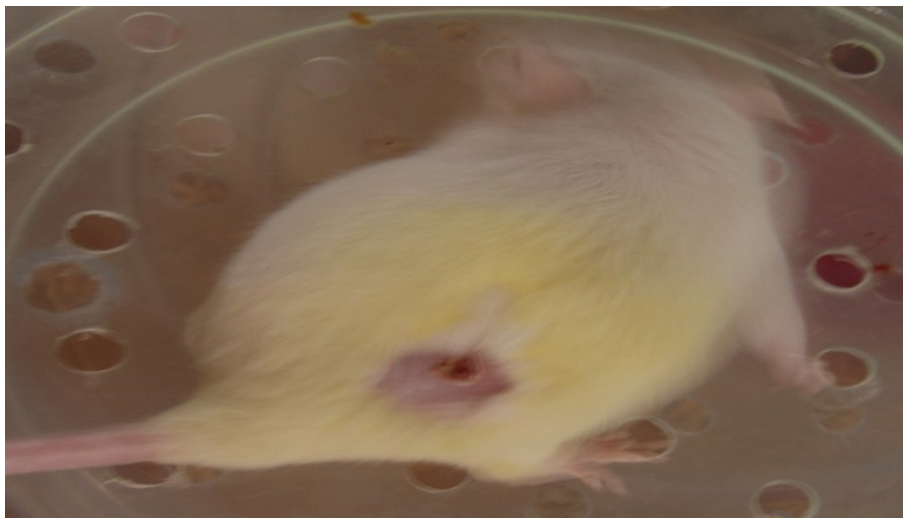

**Fig S4e.** The burn after 12 day was treated by curcumin

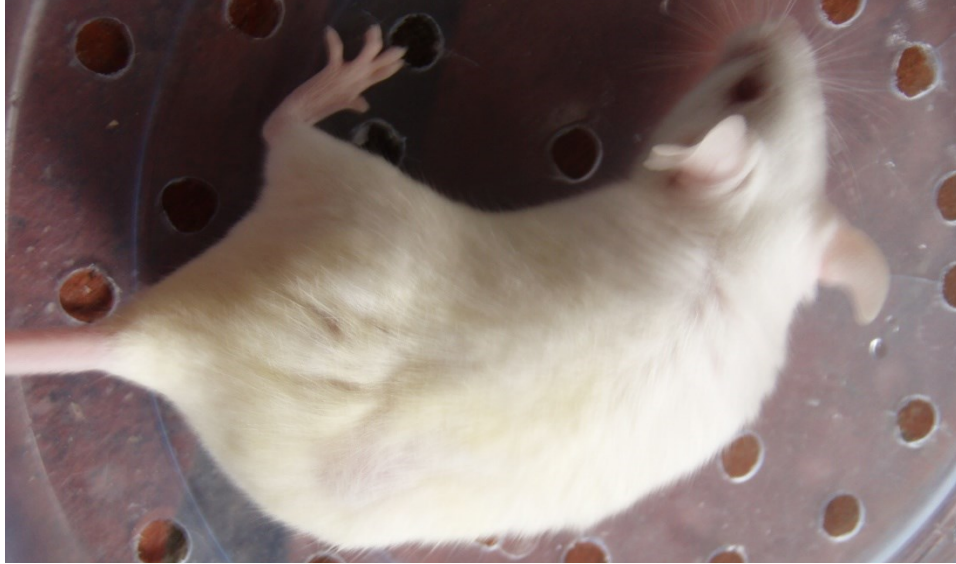

**Fig S4f.** The burn after 18 day was treated by curcumin

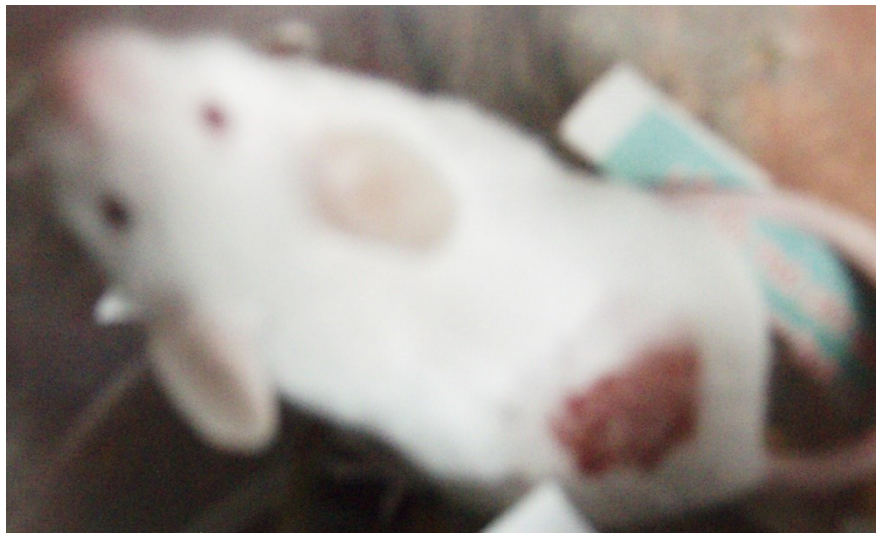

**Fig S5a.** The burn after 3 day was treated by curcumin-Ca(II)

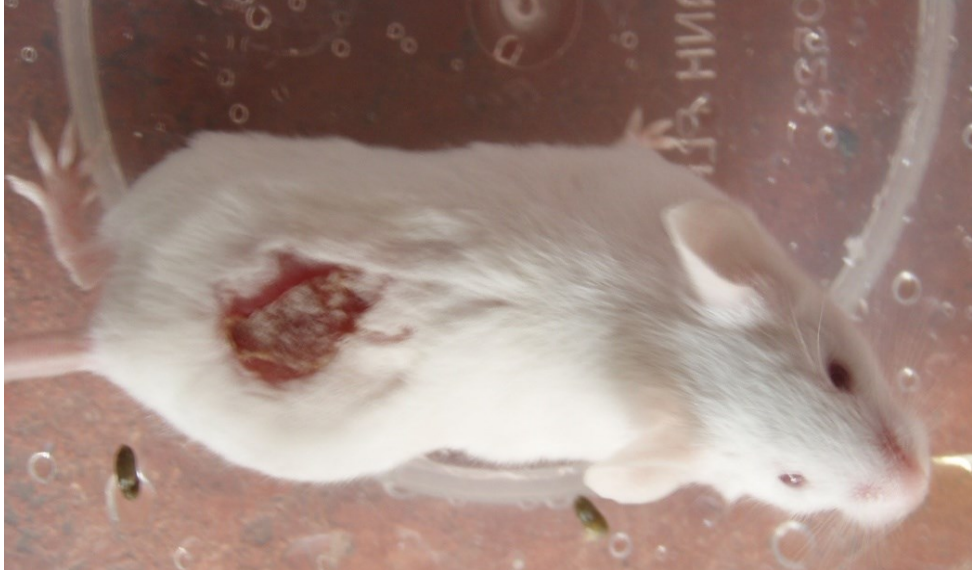

**Fig S5b.** The burn after 6 day was treated by curcumin-Ca(II)

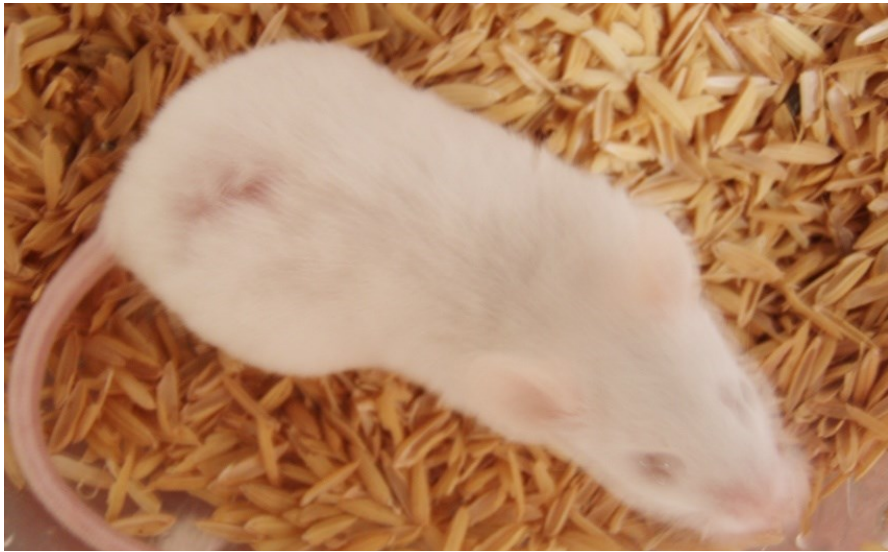

**Fig S5c.** The burn after 9 day was treated by curcumin-Ca(II)

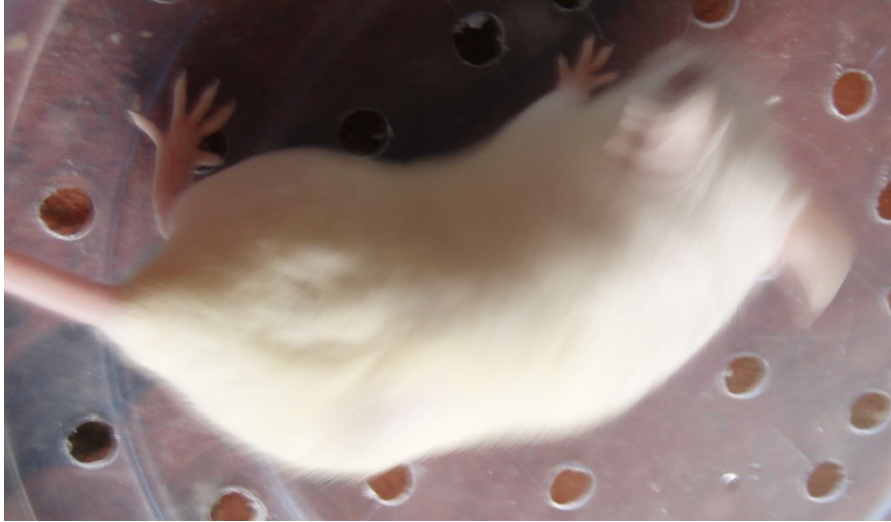

**Fig S5d.** The burn after 12 day was treated by curcumin-Ca(II)

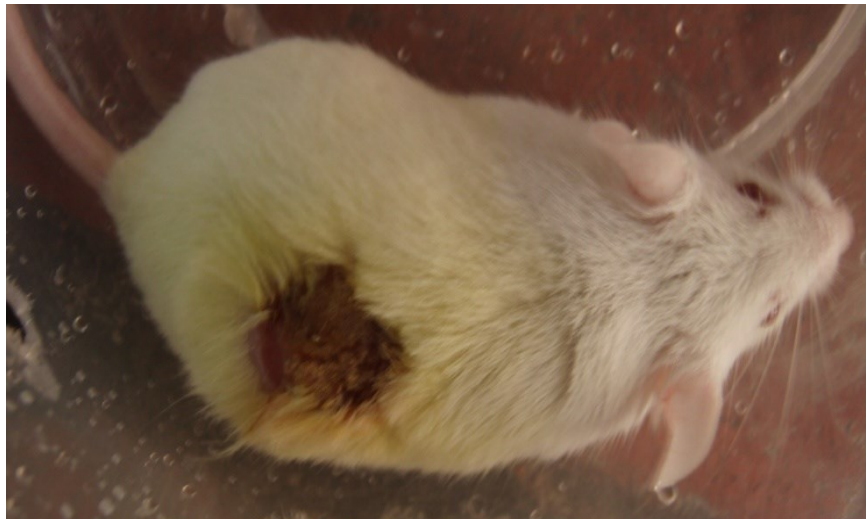

**Fig S6a.** The burn after 3 day was treated by curcumin-Zn(II)



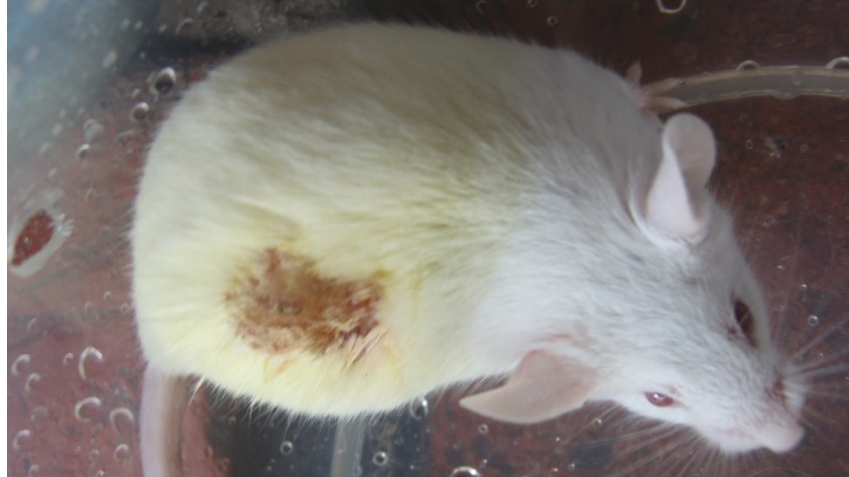

**Fig S6b. The burn after 9 day was treated by curcumin-Zn(II)**

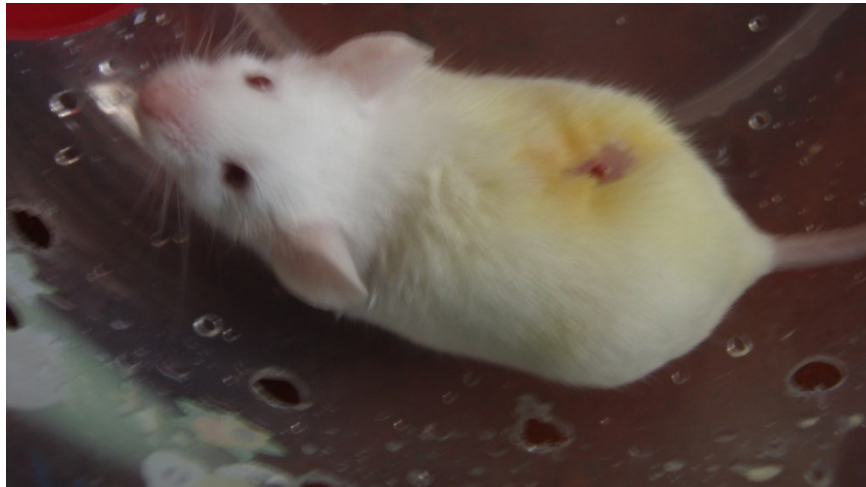

**Fig S6c. The burn after 15 day was treated by curcumin-Zn(II)**

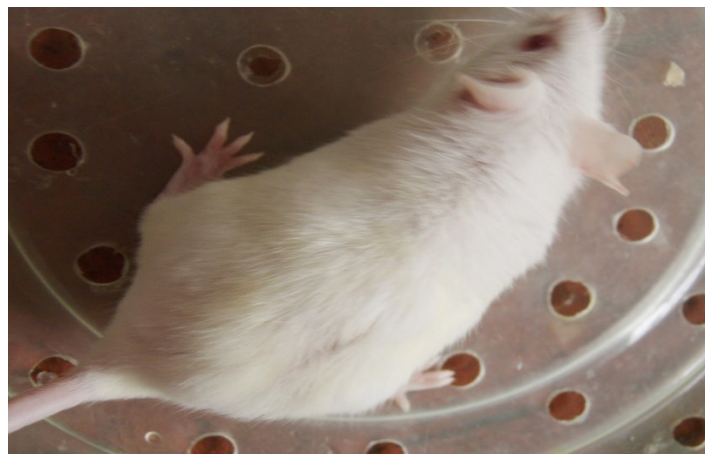

**Fig S6c. The burn after 18 day was treated by curcumin-Zn(II)**

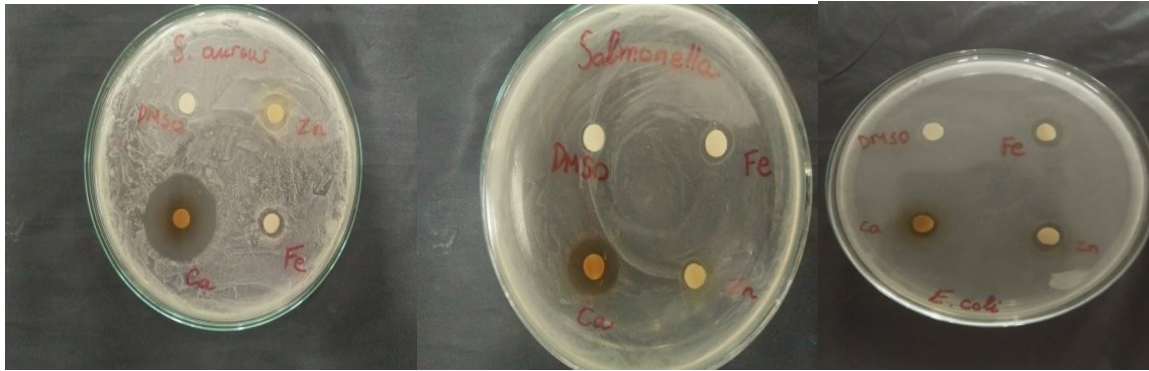

**Fig S7:** Antimicrobial activity of curcumin complexes against *Salmonella*, *S.aureus*, and *E.coli*
